# Supplementary material for: Postpartum dietary intake, depression and the concentration of docosahexaenoic acid in mature breast milk in Wuhan, China
Source: Royal Society of Chemistry journal article supplement (doi:10.1039/d2fo03129a), 2023-01-01
Supplement: d2fo03129a1.xlsx [file d2fo03129a1.xlsx]

## Sheet: general
	cut-13	DHA/100mg	supplement	Duration	mom age	education	GDM	Cesearian	baby age	pre-week	boy	birth/kg	exclusive	firstchild	pre-BMI	rice+tuber/100g	veg/100g	fri/100g	meat/100g	egg/100g	aqu/100g	milk/100nL	been/100g	nut/100g	oil/g	water/L	soup/L	energykcal	rice+tuber/100g1000kcal	veg/100g1000kcal	fri/100g1000kcal	meat/100g1000kcal	egg/100g1000kcal	aqu/100g1000kcal	milk/100nL1000kcal	been/100g1000kcal	nut/100g1000kcal	oil/g1000kcal	C10:0	C12:0	C14:0	C16:0	C18:0	SFA	C16:1	cC18:1	MUFA	aC18:3n-3(ALA)	C20:5(EPA)
1001	0	2.4	1	1	33	1	0	1	68	37.6	0	2.3	0	1	18.1	4.1	6	3	2	1	0	2.5	0	0.3	35	0.5	0	2962.75	1.4	2	1	0.7	0.3	0	0.8	0	0.1	11.8	2.14	8.62	6.39	20.48	5.99	44.71	2.87	25.14	29.11	1.57	0.15
1002	0	1.25	1	2	30	0	1	0	34	38	1	3.3	0	1	23.9	1.2	2.45	0	1.05	1	0	4	0.24	0	24	1.4	0	1903.91	0.6	1.3	0	0.6	0.5	0	2.1	0.1	0	12.6	1.36	6.78	6.04	20.32	5.66	41.49	2.35	26.37	29.87	1.67	0.07
1003	1	0	0	10	37	1	0	1	45	38	1	2.9	1	0	19.3	3.9	8.6	1.5	0.75	0.5	0	0	0.14	0	48	0.9	0	2038.82	1.9	4.2	0.7	0.4	0.2	0	0	0.1	0	23.5	1.13	4.11	2.64	20.06	6.48	35.32	1.96	29.49	32.3	3.23	0.04
1004	0	0	0	1.5	28	0	0	0	51	40	1	2.8	0	1	17.3	1.5	3.1	2.8	0	1.4	3	8.5	0	0	26	0.5	0.6	2229.04	0.7	1.4	1.3	0	0.6	1.3	3.8	0	0	11.7	0.7	2.69	3.33	23.54	5.04	36.38	4.09	33.26	38.58	1.99	0.07
1005	0	2.1	1	1.5	31	0	0	1	88	37	1	3.06	0	1	18.4	1	2.8	6	1.25	0.5	3	4	0	0	35	2	0.5	2449.95	0.4	1.1	2.4	0.5	0.2	1.2	1.6	0	0	14.3	0.71	3.55	3.57	23.9	7.57	40.63	3.16	30.68	35.25	1.37	0.07
1006	0	0	0	1	28	0	1	1	89	39	1	3.6	0	1	19.1	1.5	3.5	2	2.4	0	0	2.5	0	0.1	20	1	0.3	2487.3	0.6	1.4	0.8	1	0	0	1	0	0	8	1.62	7.49	6.58	24	6.54	47.49	4.27	19.57	25.06	1.62	0.08
1007	1	0	0	3	29	0	0	1	36	38	1	3.2	0	1	29.1	1	2	0	2	0.4	0	0	0	0	22	0.5	1.2	1468.18	0.7	1.4	0	1.4	0.3	0	0	0	0	15	0.67	2.36	1.76	21.95	5.09	32.36	2.23	36.34	39.63	1.28	0.02
1008	0	2.1	1	2.5	32	0	0	1	79	40.2	1	2.75	0	1	19.1	2.75	4.75	2.5	3.25	0.5	0	0	0.25	0	90	0.5	0.9	2719.9	1	1.7	0.9	1.2	0.2	0	0	0.1	0	33.1	1.42	4.91	3.36	19.9	5.7	36.13	3.18	28.86	32.92	2.99	0.07
1009	0	2	1	2	33	0	0	0	80	40.1	1	3.73	1	1	24.9	3.2	1.2	1.2	0.55	0	0.5	4.8	0	0	40	1.5	0	1884.55	1.7	0.6	0.6	0.3	0	0.3	2.5	0	0	21.2	0.69	4.36	3.89	20.53	5.63	36	2.22	30.8	33.88	1	0.06
1010	1	0	0	2	30	0	1	0	106	39	1	3.4	1	1	20.7	4.55	1.65	0	0.7	0	0	0	0	0	27	1.5	0	1366.38	3.3	1.2	0	0.5	0	0	0	0	0	19.8	1.38	5.27	3.73	20.42	7.23	38.96	3.28	29.09	33.5	1.47	0.03
1011	1	0	0	3	31	1	0	1	54	39.2	0	3.75	1	1	23.3	3	2	4.2	1.5	0.5	0	0	0	0	40	1.5	0	1902.2	1.6	1.1	2.2	0.8	0.3	0	0	0	0	21	1.27	4.28	3.33	21	3.84	34.57	4.66	33.65	39.64	1.44	0.04
1012	0	0	0	2	34	1	0	1	37	38.2	1	3.4	0	0	19.5	2.5	3.2	6.2	1.85	1	0	2.85	0	0	30	0.5	0.75	2542.7	1	1.3	2.4	0.7	0.4	0	1.1	0	0	11.8	1.3	7.33	6.25	20.42	5.63	41.8	3.29	27.26	31.62	2	0.11
1013	0	0	0	3.5	40	0	0	1	67	37.4	0	2.9	0	1	30.5	5.2	5.5	1	2.1	0.5	0	0	0	0	45	1.5	1	2845.35	1.8	1.9	0.4	0.7	0.2	0	0	0	0	15.8	0.91	4.6	4.37	22.43	6.6	39.8	4.37	29.29	34.97	2	0.1
1014	0	1.5	1	3	31	0	0	1	88	37.5	0	2.85	1	1	21.5	3.25	2.2	4.5	0.45	0	1.5	2.5	0.25	0	25	1	0.4	2602.8	1.2	0.8	1.7	0.2	0	0.6	1	0.1	0	9.6	0.65	4.57	3.69	20.17	4.22	33.96	3.39	35.91	40.33	2.23	0.1
1015	0	3	1	2.5	35	0	0	1	81	39	1	4	1	1	24.8	3	8	4	1.3	0	0	5	0	0	59	2	0	2219.41	1.4	3.6	1.8	0.6	0	0	2.3	0	0	26.6	0.64	4.95	4.67	22.89	5.47	39.64	1.69	30.54	33.08	1.16	0.09
1016	0	0	0	2.5	36	0	0	0	86	37.3	1	3	1	1	17.9	2.25	4.5	2	1.2	0.3	1.3	5	0	0	37	1.5	0	1985.18	1.1	2.3	1	0.6	0.2	0.7	2.5	0	0	18.6	0.82	4.85	4.9	21.68	5.29	38.61	3.34	29.9	34.35	1.4	0.05
1017	0	0	0	1	28	0	0	1	45	39	0	3.2	1	1	19.6	4.05	1.75	2	0.55	1	0.6	0	0	0	26	1.5	0	1541.39	2.6	1.1	1.3	0.4	0.6	0.4	0	0	0	16.9	0.79	3.98	2.82	22.05	4.88	35.13	5.3	32.22	38.6	1.42	0.05
1018	0	0	0	2	30	0	0	0	38	36.6	1	2.5	1	1	22	1	3	0	1.5	0	1	0	0.1	0	30	1	0.2	1147.7	0.9	2.6	0	1.3	0	0.9	0	0.1	0	26.1	0.44	3.27	3.22	24.09	4.84	36.64	4.64	34.07	39.78	1.24	0.09
1019	0	0	0	1	36	0	0	1	83	38.5	1	3	1	1	18.6	3.5	6.5	3	2.9	1	0	0	0	0	56	3	1.7	3399.84	1	1.9	0.9	0.9	0.3	0	0	0	0	16.5	0.62	3.36	3.16	22.88	6.68	37.77	2.51	31.16	34.73	1.29	0.07
1020	0	2	1	3.5	28	0	0	0	109	38	0	3	1	1	16.7	1.95	4.75	4	0.95	0.75	0	0	0	0	40	2	0.2	2214.4	0.9	2.1	1.8	0.4	0.3	0	0	0	0	18.1	0.73	2.9	2.06	21.78	7.88	36.93	2.89	32.52	36.71	1.83	0.09
1021	1	2.1	1	3	29	0	0	0	95	39.4	0	3.47	0	1	21.3	3.5	3.5	2	0.3	0	3	0	0	0	34	1	0.3	2538.16	1.4	1.4	0.8	0.1	0	1.2	0	0	0	13.4	0.81	6.89	7.15	19.51	3.59	38.65	2.82	26.13	29.73	1.33	0.08
1022	0	1.05	1	3.5	30	0	0	0	100	39	0	2.97	1	1	18.4	3	2.5	2	2.05	0.2	0	1.25	0	0	29	2	0.2	2068.26	1.5	1.2	1	1	0.1	0	0.6	0	0	14	0.44	2.79	2.5	22.21	5.47	34.19	4.32	32.42	37.72	1.63	0.29
1023	0	0	0	5	27	1	0	0	120	37.5	0	3.25	1	1	24.5	1.5	1.7	1.5	1.2	0.5	0.6	5	0	0	18	1.5	0.4	1703.12	0.9	1	0.9	0.7	0.3	0.4	2.9	0	0	10.6	0.29	4.55	5.34	24.29	5.78	41.32	2.73	29.08	32.8	8.65	0.12
1024	0	0	0	1.5	35	0	1	1	59	36.5	1	3	0	0	16.9	2	1.8	0	0.5	1.5	0.3	0	0.25	0	23	2	0.1	1727.97	1.2	1	0	0.3	0.9	0.2	0	0.1	0	13.3	0.09	1.84	2.64	17.39	4.36	26.7	2.02	33.85	36.53	1.32	0.04
1025	0	0	0	0.5	31	0	0	1	84	39.4	0	2.94	0	1	22	3	3	2	1.5	0.5	0.9	0	0	0	30	2	0	1779.2	1.7	1.7	1.1	0.8	0.3	0.5	0	0	0	16.9	0.92	3.84	3.32	20.82	5.43	35.26	4.48	31.1	36.83	2.2	0.06
1026	0	0	0	2	28	1	0	1	113	39.1	0	3.5	1	1	21.8	2	2	5.2	0.6	0	0.6	0	0	0	16	1.05	0	1789.24	1.1	1.1	2.9	0.3	0	0.3	0	0	0	8.9	0.63	5.16	4.27	18.48	5.39	34.77	2.67	29.57	33.11	2.69	0.06
1027	1	0	0	3.5	30	0	0	0	71	38.5	0	3.3	1	0	22.6	3	1.2	0	1.9	0.8	0	1.2	0	0	49	1	0.4	1520.31	2	0.8	0	1.2	0.5	0	0.8	0	0	32.2	0.72	4.21	4.02	22.59	6.81	39.6	3.36	30.7	35.25	1.86	0.09
1028	0	2.1	1	2.5	30	0	0	0	103	38.6	1	3.27	1	1	17.3	0.3	3.5	2.3	0.6	0	1	1.2	0	0	26	2.75	0.4	2107.54	0.1	1.7	1.1	0.3	0	0.5	0.6	0	0	12.3	1.37	6.01	5.48	18.94	6.97	39.81	2.28	32.34	36.07	2.39	0.13
1029	0	0	0	3.5	27	0	0	1	84	39	1	3.43	1	1	18.3	3.2	4.45	3.8	0.8	1.05	0	0	0	0	29	1.2	0.6	1892.86	1.7	2.4	2	0.4	0.6	0	0	0	0	15.3	1.52	8.79	6.86	19.96	3.96	41.63	2.2	33.88	37.47	1.64	0.05
1030	0	0	0	2	30	0	1	0	30	38.3	0	2.84	0	1	26.7	1.3	5	0.3	1.5	1.2	2	2.5	0.32	0.1	46	0.7	1.5	2662.44	0.5	1.9	0.1	0.6	0.5	0.8	0.9	0.1	0	17.3	1.01	3.91	2.95	18.87	4.33	31.87	1.72	29.39	31.98	2	0.07
1031	0	0	0	2	25	1	0	1	30	40.2	0	3.2	0	1	17.6	3.7	4	2.7	0.9	0.15	0	0	0	0.15	75	0.7	0.6	2496.4	1.5	1.6	1.1	0.4	0.1	0	0	0	0.1	30	1.66	8.32	6.82	17.36	4.37	39.44	2.66	27.68	31.5	3.64	0.11
1032	0	0	0	1	30	1	0	1	49	39	1	3.5	0	0	21.4	1.5	3	2	1.2	1	0	0	1	0	34	1.2	0.2	1741.66	0.9	1.7	1.1	0.7	0.6	0	0	0.6	0	19.5	1.73	7.07	5.77	19.74	6.19	41.56	2.89	26.21	30.15	2.59	0.08
1033	0	2.1	1	4.5	38	0	0	1	50	36.5	1	2.2	1	1	25.9	2	2	1.5	0	0.5	0.3	0	0	0	27	1	0	1432.43	1.4	1.4	1	0	0.3	0.2	0	0	0	18.8	0.57	3.89	3.53	22.12	4.36	35.04	3.55	30.51	34.79	1.65	0.07
1034	0	0	0	1.5	37	0	1	0	52	39	1	3.45	0	1	25.2	2.5	3.2	4.2	0.6	0.5	0.8	2.5	0.5	0	28	1	0.5	2037.17	1.2	1.6	2.1	0.3	0.2	0.4	1.2	0.2	0	13.7	1.03	2.97	2.02	20.34	6.53	33.79	2.62	34.25	39.34	2.77	0.05
1035	0	0	0	10	32	1	1	1	88	38	0	3.3	1	0	22.5	4.5	3.5	2	0.6	0.5	0	0	0.8	0	40	1.5	0	2637.5	1.7	1.3	0.8	0.2	0.2	0	0	0.3	0	15.2	0.27	3.98	4.19	22.41	4.52	35.81	1.92	29.92	32.42	0.83	0.05
1036	0	0	0	1.5	29	0	0	0	70	40	0	3.15	1	1	19.4	2	1.1	1.5	0.4	0.2	1	2.5	0	0	14	1.2	0	1862.16	1.1	0.6	0.8	0.2	0.1	0.5	1.3	0	0	7.5	0.71	4.45	3.64	21.26	5.24	36.27	3.56	33.74	38.55	2.21	0.06
1037	0	0	0	1.5	39	0	1	1	120	38.3	0	3	1	0	24.1	2.7	2.4	2	1.2	1.5	0.9	2	0	0	45	1.5	0.4	2087.85	1.3	1.1	1	0.6	0.7	0.4	1	0	0	21.6	1.14	6.97	6.96	19.7	5.89	41.99	3.41	30.34	35.03	0.76	0.08
1038	0	2.35	1	1.5	31	0	0	0	48	39.5	1	2.9	1	1	28	1.15	2	3.7	0.5	0.5	0.25	2	0	0	15	1.5	0.2	1718.8	0.7	1.2	2.2	0.3	0.3	0.1	1.2	0	0	8.7	1.36	7.24	6.61	23.26	5.81	45.36	3.05	29.27	33.51	1.55	0.21
1039	0	0	0	2	30	0	1	0	40	38.3	1	3.6	1	1	20.8	3.4	3.3	1.2	0.7	0.7	1	0	0	0	26	2.4	0.2	1915.24	1.8	1.7	0.6	0.4	0.4	0.5	0	0	0	13.6	1.22	7.55	6.01	18.12	3.98	37.55	2.88	32.36	36.4	2.8	0.13
1040	0	4.2	1	2	23	1	0	0	82	40	0	3.1	1	1	26	1.8	2.78	2.4	0	0.5	0	3	0.25	0	20	1.7	0.4	1368.4	1.3	2	1.8	0	0.4	0	2.2	0.2	0	14.6	0.87	2.93	2.32	22.12	6.33	35.34	1.81	30.89	33.4	2.41	0.06
1041	0	0.84	1	7	30	0	0	0	115	38.6	1	3.22	1	1	20	5.3	3	0	1	1	0.3	2	0.5	0	62	1.7	0.5	3347.83	1.6	0.9	0	0.3	0.3	0.1	0.6	0.1	0	18.5	1.36	6.45	4.93	21.83	5.37	40.77	3.14	30.47	34.42	0.9	0.05
1042	0	0	0	2	27	0	0	1	33	39.1	1	3.3	0	1	18.8	1.2	0.3	5.5	1.5	0	2.4	2	0	0	41	2.5	0.25	1975.04	0.6	0.2	2.8	0.8	0	1.2	1	0	0	20.8	0.92	6.12	5.67	20.22	5.42	39.31	4.09	30.52	36.02	1.97	0.06
1043	0	0	0	3.5	29	1	0	0	58	40.5	0	3.9	1	1	26.7	2.1	2	5.2	0.3	1	0	0	0	0	12	2	0.6	1039.68	2	1.9	5	0.3	1	0	0	0	0	11.5	0.87	5.79	4.53	19.72	4.65	36.11	2.97	35.91	39.9	2.16	0.04
1044	0	0	0	1	23	1	0	0	100	36.3	1	2.8	1	1	19.8	2.5	1.5	1.5	0	0	1.9	0	0.2	0	44	1	1.4	1803.86	1.4	0.8	0.8	0	0	1.1	0	0.1	0	24.4	1.15	5.23	3.95	17.07	4.25	32.64	3.19	28.65	33.01	1.84	0.3
1045	0	0	0	2	31	0	1	1	43	38.4	0	3.1	1	1	19	2.3	3.56	0	1	0	0	0	0	0	46	1.8	0.6	1929.84	1.2	1.8	0	0.5	0	0	0	0	0	23.8	1.28	5.32	3.09	20.41	4.67	35.32	2.62	37.59	41.38	1.41	0.04
1046	0	0	0	1.5	28	1	0	0	43	40	1	3.54	1	1	18.4	1.1	4.05	1.2	0.95	0.7	0.5	0	0	0	29	1.5	0.6	1427.91	0.8	2.8	0.8	0.7	0.5	0.4	0	0	0	20.3	1.29	3.6	2.4	20.79	4.57	33.34	3.18	31.86	36.02	1.66	0.07
1047	0	0	0	3	27	0	0	1	49	38.1	0	2.55	0	1	16.4	1.95	1.7	3.2	1	1.3	0	0	0	0	15	1	0	1195.5	1.6	1.4	2.7	0.8	1.1	0	0	0	0	12.5	0.83	3.89	2.94	22.15	5.74	36.41	4.16	32.85	38.14	1.3	0.04
1048	0	0	0	2	25	1	0	0	117	38	1	2.85	1	1	20.7	3.75	1.95	1	0.35	0.15	0	0.3	0	0	23	1.25	0.4	2341.92	1.6	0.8	0.4	0.1	0.1	0	0.1	0	0	9.8	1.08	5.74	4.91	22.33	5.88	41.01	2.61	27.82	31.4	2.75	0.06
1049	0	0	0	1	32	0	0	0	120	38	1	3.3	1	0	21	4.5	5.25	4.2	1.75	0.5	1	0	0	0	75	1	0	3571.1	1.3	1.5	1.2	0.5	0.1	0.3	0	0	0	21	1.54	6.82	6.3	20.76	4.76	41.19	3.43	26.27	30.7	1.58	0.08
1050	0	4.8	1	1.5	28	1	0	0	39	39.1	0	2.95	1	1	20.7	1.75	3.15	2.5	0.25	0.2	0	0	0	0	36	1.5	0.5	1837.14	1	1.7	1.4	0.1	0.1	0	0	0	0	19.6	1.85	7.21	5.76	22.72	6.35	45.06	2.28	27.4	30.72	1.18	0.22
1051	0	0	0	2	30	1	0	1	120	39.2	0	2.8	1	1	19.9	2	2.4	0.7	3.4	1.75	0	2	0.36	0	45	1.05	0.6	2050.75	1	1.2	0.3	1.7	0.9	0	1	0.2	0	21.9	1.51	6.51	6.23	21.71	6.09	43.07	2.24	29.62	32.95	2.37	0.03
1052	0	0.65	1	1	31	0	0	1	38	36.3	1	2.4	0	1	20.1	2	4.33	1	1.1	0.5	1.1	0	0	0	28	1.6	0.65	1830.35	1.1	2.4	0.5	0.6	0.3	0.6	0	0	0	15.3	0.73	3.71	3.2	19.18	5	32.57	1.84	34.02	36.76	3.04	0.09
1053	1	0	0	2.5	31	0	0	1	78	38.2	0	3.03	1	1	21	2.75	0	0	1.1	0	0	0	0.5	0	21	2	0	1520.44	1.8	0	0	0.7	0	0	0	0.3	0	13.8	0.64	3.62	3.46	24.92	4.65	37.96	3.68	30.11	34.58	1.94	0.1
1054	0	0	0	0.5	29	1	0	1	32	40	1	3.3	1	1	23.5	0.75	0.5	5	1	0.5	0.5	0	0	0	15	1.75	0	1413.4	0.5	0.4	3.5	0.7	0.4	0.4	0	0	0	10.6	1.35	7.84	6.07	22.22	4.83	43.17	3.58	30.83	35.43	0.91	0.06
1055	0	0	0	2.5	29	0	0	1	44	38.5	0	2.85	1	1	21.8	3.2	3.9	6.2	0.3	1	0	3	0.06	0	54	2.5	1	2203	1.5	1.8	2.8	0.1	0.5	0	1.4	0	0	24.5	0.92	3.4	2.39	20.76	6.41	35.89	2.62	31.64	35.43	2.08	0.1
1056	0	0	0	22	26	0	0	0	46	40	0	4.1	1	1	22.5	3.8	3.35	0.8	1.4	1.95	0.5	1.6	0	0	33	2	0.3	2521.37	1.5	1.3	0.3	0.6	0.8	0.2	0.6	0	0	13.1	0.99	4.12	3.57	20.99	5.98	37.07	3.28	31.95	36.43	1.57	0.04
1057	0	0	0	1	35	1	0	1	43	38.6	0	4.3	1	0	21	3	5.5	0	0.8	2	0	0	0	0	39	1.5	0.5	2203.61	1.4	2.5	0	0.4	0.9	0	0	0	0	17.7	1.41	5.7	4.16	23.78	4.9	40.84	2.62	33.43	37.09	0.86	0.07
1058	0	0	0	2.5	25	0	0	1	30	40.2	0	3.52	0	1	23	3	1.4	2	2.2	0	1.15	2.5	0	0.4	77	1.8	0.2	3264.53	0.9	0.4	0.6	0.7	0	0.4	0.8	0	0.1	23.6	0.53	6.3	5.93	21.49	4.75	39.82	3.02	29.63	33.61	1.76	0.04
1059	0	0	0	7.5	39	0	0	1	31	39	0	3.55	0	1	20.3	1.1	0	3.7	0.5	1.7	0	0	0	0	15	2.2	0.4	1345.85	0.8	0	2.7	0.4	1.3	0	0	0	0	11.1	1.05	6.19	5.13	20.9	4.25	38.28	3.57	30.82	36.1	1.43	0.05
1060	0	0	0	2.5	29	0	0	0	53	41	0	3.28	0	1	16.2	2.2	1.9	1.5	1.1	0.8	0.3	0	0.1	0	40	1	0.3	2119.2	1	0.9	0.7	0.5	0.4	0.1	0	0	0	18.9	0.8	4.58	3.78	21.8	5.71	37.78	2.8	29.63	33.45	1.95	0.08
1061	1	0	0	2	29	0	0	1	62	38.6	0	3.35	1	1	18.2	1.9	2.5	5.5	0.7	0.5	0	0	0	0.2	15	5	1	1773.73	1.1	1.4	3.1	0.4	0.3	0	0	0	0.1	8.5	1.11	5.54	4.88	20.08	4.16	36.47	4.67	26.98	32.55	8.93	0.14
1062	1	0	0	1.5	30	0	0	0	108	41	1	3.79	1	1	19.5	1.5	2.9	0	0.8	0.3	0	5	0	0	20	1.5	0	1280.7	1.2	2.3	0	0.6	0.2	0	3.9	0	0	15.6	0.47	3	3.35	21.19	5.91	34.9	1.92	31.7	34.5	2.18	0.03
1063	0	0	0	4	35	1	0	1	51	37.5	1	3.33	1	0	22	2.75	1.6	0	1.7	0	0	0	0	0	19	1.3	0.6	1483.76	1.9	1.1	0	1.1	0	0	0	0	0	12.8	0.78	3.73	2.65	18.6	4.07	30.22	2.06	35.08	39.12	1.3	0.04
1064	0	0	0	2	28	0	0	0	80	39	0	3.4	1	1	25	2	2.9	6	2.8	0	0	5	0	0	57	2	0.4	2236.73	0.9	1.3	2.7	1.3	0	0	2.2	0	0	25.5	1.06	5.72	4.81	22.22	5.7	40.32	2.74	30.21	33.8	1.07	0.06
1065	0	0	0	3	31	0	1	1	36	38.5	1	3.75	0	1	20.4	2.15	3.72	3.8	0.3	0.8	1.8	1.2	0	0	30	1.2	0.9	2163.05	1	1.7	1.8	0.1	0.4	0.8	0.6	0	0	13.9	1.18	4.51	4.2	23.37	6.08	40.42	2.4	29.52	33.04	1.05	0.14
1066	0	0	0	1.5	29	0	0	1	45	38	0	2.65	0	1	19.8	1	2.1	3	2	0.5	1.1	0	0	0	29	2.7	0.4	1772.41	0.6	1.2	1.7	1.1	0.3	0.6	0	0	0	16.4	0.74	3.1	2.76	20.24	5.08	32.6	3.18	31.64	35.72	2.05	0.11
1067	1	0	0	0.5	28	0	1	0	55	39.1	1	3.28	1	1	28.2	2	3.75	10	0.65	0.5	0.6	3.7	0	0	83	2.7	0.2	2294.52	0.9	1.6	4.4	0.3	0.2	0.3	1.6	0	0	36.2	0.63	6.52	9.45	21.96	6.2	45.87	2.54	26.94	30.52	1.74	0.05
1068	1	0	0	4	28	0	1	0	47	38	1	2.83	1	1	19.9	0.5	0.5	6	0	0	0	5	0	0	23	2	0.5	1885.17	0.3	0.3	3.2	0	0	0	2.7	0	0	12.2	0.99	3.34	3.47	21.3	6.11	36.35	2.2	28.4	31.63	2.78	0.07
1069	0	0	0	3	30	0	0	1	41	36	1	2.5	0	1	21.9	2.5	3.1	0.3	1.2	0.5	0	0	0	0	33	1.5	0.5	2173.97	1.1	1.4	0.1	0.6	0.2	0	0	0	0	15.2	1.55	5.49	3.97	20.3	4.79	36.85	2.86	29.16	32.95	1.86	0.07
1070	1	0	0	1	38	1	0	1	48	40	1	3.9	1	0	20	4.5	0.6	5.4	0	0	1	2.5	1.7	0	28	3	0.6	3028.62	1.5	0.2	1.8	0	0	0.3	0.8	0.6	0	9.2	1.46	5.39	4	17.69	5.03	34.54	2.11	30	34.7	4.85	0.08
1071	0	0	0	2	33	0	1	1	44	39	0	3.55	1	1	19.8	3	3.3	1.35	0.2	0.6	0.5	0	0	0	46	2	0.6	2118.99	1.4	1.6	0.6	0.1	0.3	0.2	0	0	0	21.7	0.93	2.35	1.49	18.78	5.61	30.09	2.45	30.39	33.77	3.35	0.04
1072	0	2.1	1	3	31	0	1	1	35	39.4	0	3.25	1	1	22.9	4.5	2.15	1	1	0.5	1.05	4	0	0	57	2.3	0.4	2496.23	1.8	0.9	0.4	0.4	0.2	0.4	1.6	0	0	22.8	0.98	4.12	3.26	20.33	5.74	36	2.95	31.43	35.6	1.31	0.15
1073	0	0	0	0.5	28	1	0	1	68	38.1	1	3.2	0	1	19.3	4	4.53	3.2	1	0	0	2	0	0	55	0.4	0	2434.08	1.6	1.9	1.3	0.4	0	0	0.8	0	0	22.6	1.75	7.7	6.91	19.84	4.97	42.27	3.8	28.71	34.72	2.45	0.08
1074	1	0	0	2.5	24	1	1	1	93	35.6	0	2	1	1	20.2	2.3	2	0	0.6	0.3	0	2.5	0.4	0	31	3	0.65	1991.49	1.2	1	0	0.3	0.2	0	1.3	0.2	0	15.6	0.75	2.59	2.18	22.38	5.46	33.88	4.05	34.4	39.39	0.93	0.04
1075	0	0	0	0.5	31	1	0	0	52	39.4	1	3.43	1	1	23	2.25	2.5	0	0.7	0.5	0	0	0	0	47	2	0.5	2304.78	1	1.1	0	0.3	0.2	0	0	0	0	20.4	1.43	4.49	3.46	19.7	7.08	38.22	2.66	31.99	36.11	1.12	0.05
1076	0	0	0	3.5	31	0	0	1	36	39.5	0	3.68	0	1	19.5	2.5	1.9	0	0.7	1.2	0	0	0	0	17	1.5	0.2	1615.03	1.5	1.2	0	0.4	0.7	0	0	0	0	10.5	1.07	3.6	2.52	19.64	5.04	32.54	2.93	30.79	34.58	0.91	0.02
1077	0	0	0	3.5	28	0	0	1	73	39.5	0	3.29	1	1	23.9	1.5	3.8	0	1.6	0.5	0	2	0	0	32	2.1	0.4	1651.48	0.9	2.3	0	1	0.3	0	1.2	0	0	19.4	1.24	4.76	3.78	20.53	6.03	37.48	3.27	27.94	32.34	3.17	0.04
1078	0	0	0	2.5	35	0	0	1	35	39.3	1	4.15	1	0	19.3	1.45	5.3	1	0.6	1	0	2.5	0	0	35	2	0.8	1922.55	0.8	2.8	0.5	0.3	0.5	0	1.3	0	0	18.2	1.45	5.44	4.42	21.01	4.77	37.96	2.4	29.21	32.41	0.86	0.05
1079	0	0	0	2	33	1	0	1	60	38	1	3.47	1	1	21.1	2	1.83	2	2.3	0	0	2.5	0.06	0	46	4	0.2	2421.99	0.8	0.8	0.8	0.9	0	0	1	0	0	19	1.17	4.37	3.63	21.06	6.15	37.43	2.6	28.98	32.65	2.38	0.05
1080	0	0	0	0.5	37	1	0	1	104	38	0	2.55	1	0	18.9	1.7	3.1	2	1.3	0.5	0.2	2	0	0	23	2.7	0.2	1445.27	1.2	2.1	1.4	0.9	0.3	0.1	1.4	0	0	15.9	1.26	5.18	4.12	21.03	6.49	39.16	2.09	26.32	29.27	2.46	0.06
1081	0	2	1	2	34	0	0	1	44	38	0	3.6	0	0	21.5	3.8	4.2	2.2	1.25	0.8	0	1.5	0.125	0	35	2.2	0	2581.05	1.5	1.6	0.9	0.5	0.3	0	0.6	0	0	13.6	1.37	5.75	5.03	20.67	5.97	40.38	2.04	29.54	32.81	1.77	0.07
1082	0	0	0	1	29	0	0	0	60	38	0	2.34	1	1	25.2	2	2.1	4.1	1	0.9	0	0	0	0	44	1.5	0.2	1927.96	1	1.1	2.1	0.5	0.5	0	0	0	0	22.8	1.19	4.35	3.49	21.03	6.19	37.19	2.52	32.59	36.42	3.55	0.04
1083	0	0	0	2	36	0	0	0	115	35.1	1	2.35	1	1	23.4	3	2.5	1	0	0	1	0	1	0	20	1.7	0	2612.3	1.1	1	0.4	0	0	0.4	0	0.4	0	7.7	1.1	4.17	3.41	22.25	4.34	35.9	2.67	29.65	33.13	1.53	0.04
1084	0	4.2	1	1	34	0	0	1	93	35	0	3.13	0	0	19.2	0.9	5.9	3	1.4	0.5	0	0.5	0	0	73	2.5	0.2	1686.37	0.5	3.5	1.8	0.8	0.3	0	0.3	0	0	43.3	1.36	4.1	2.87	19.19	6.73	35.43	2.01	28.57	31.59	3.75	0.05
1085	0	4.2	1	2.5	28	0	0	0	48	35	0	2.2	0	1	22.6	1.75	3.33	3	0.3	0	0	0	0	0	20	1	0.8	1493.9	1.2	2.2	2	0.2	0	0	0	0	0	13.4	0.9	3.27	2.65	21.41	5.1	34.59	4.28	31.22	36.7	1.58	0.06
1086	0	0	0	4	32	1	0	1	66	38.5	0	2.5	1	1	29.3	1.65	1.7	2.3	0.7	1	1	0	0	0	44	3	0.3	1705.16	1	1	1.3	0.4	0.6	0.6	0	0	0	25.8	1.84	7.32	6.51	22.44	5.76	45.06	2.74	25.3	29.16	1.36	0.08
1087	0	0	0	1.5	32	1	0	1	85	38	1	3	1	0	19.8	8	6.69	0.9	2.4	0.9	0.3	0	0.075	0.1	58	2.5	0.8	4450.56	1.8	1.5	0.2	0.5	0.2	0.1	0	0	0	13	1.21	4.87	3.59	22.68	4.45	37.45	2.73	28.62	32.01	0.9	0.04
1088	0	0.5	1	2.5	32	0	0	1	79	38.3	1	3.1	1	1	22.7	3.5	6.1	2	0.5	1.6	1	0	0	0	46	3.5	0	2489.14	1.4	2.5	0.8	0.2	0.6	0.4	0	0	0	18.5	1.15	4.71	4.77	22.02	5.22	39.06	3.85	31.17	37.14	2.69	0.1
1089	0	0	0	3	32	0	0	0	91	37.6	1	2.85	0	1	22.4	2	2.9	0	1.6	0	0.9	5	0.08	0.3	30	0.5	0.6	2777.9	0.7	1	0	0.6	0	0.3	1.8	0	0.1	10.8	1.55	6.72	6.6	20.21	6.49	42.93	3.24	26.43	30.88	1.61	0.1
1090	0	0	0	0.5	31	0	0	0	38	40	1	3.4	0	1	19.8	1	3.04	4.7	1.4	0	0	0	1.4	0.1	29	2.1	1	1783.05	0.6	1.7	2.6	0.8	0	0	0	0.8	0.1	16.3	1.12	3.09	2.45	20.8	6.76	35.62	4.08	31.64	37.03	2.52	0.07
1091	0	0	0	3	38	1	0	1	47	39.3	1	4.1	1	0	24.6	2	3.7	2	2	0	0	0	0.2	0	60	2.1	0.2	2133.1	0.9	1.7	0.9	0.9	0	0	0	0.1	0	28.1	1.04	5.07	4	20.83	6.72	38.53	2.11	32.31	35.5	1.89	0.06
1092	0	2.1	1	1	36	0	0	1	38	38.1	1	3.05	1	1	23.9	2.2	3.2	0	1.2	0.5	0.5	0	0.04	0	51	2	1	1795.39	1.2	1.8	0	0.7	0.3	0.3	0	0	0	28.4	1.31	4.37	3.76	20.97	5.97	37.38	4.45	32.73	38.79	2.89	0.11
1093	1	2.5	1	2	31	0	0	0	92	39.5	1	3.3	1	1	18.6	2	1	3	1.4	0	0	0	0	2	15	1	0.6	2840.85	0.7	0.4	1.1	0.5	0	0	0	0	0.7	5.3	1.49	7.13	5.15	20.15	7.71	42.69	3.66	29.08	34.2	2.3	0.07
1094	0	0	0	0.5	30	0	0	0	64	40	1	3.55	1	1	20.5	3	1.63	3.5	2.5	0.4	0	2	0.25	0	40	1.8	0.6	2548.03	1.2	0.6	1.4	1	0.2	0	0.8	0.1	0	15.7	0.85	2.02	3.14	22.81	5.9	36.01	4.52	32.66	38.53	2.48	0.08
1095	0	0	0	6	28	0	0	1	56	34.5	0	1.6	0	1	20	2.5	5	1	1.7	0.5	0	3	0	0	36	1.8	0.3	2084.74	1.2	2.4	0.5	0.8	0.2	0	1.4	0	0	17.3	1.86	8.37	7.63	19.37	5.22	43.32	4.67	28.77	34.86	1.42	0.05
1096	0	0	0	1	34	0	0	1	41	38.3	1	2.85	1	0	22.8	3	1	4	0.5	1.5	0	5	0	0	25	0.5	1	2148	1.4	0.5	1.9	0.2	0.7	0	2.3	0	0	11.6	0.93	3.29	2.57	23.1	5.83	36.32	2.96	34.86	38.84	1.2	0.02
1097	1	0	0	0.5	25	1	0	0	99	39	0	3.4	1	1	19.1	2.75	1.3	1.7	0.8	0	2.5	5	0	0	80	0.6	0	2787.05	1	0.5	0.6	0.3	0	0.9	1.8	0	0	28.7	0.99	3.32	2.24	18.79	5.29	31.42	2.7	32.35	35.98	1.21	0.08
1098	0	0	0	1	32	0	1	1	53	41.1	1	3.85	1	1	20.3	2	3.2	1.6	0.7	0.5	0.6	2	0	0	25	3	0.4	3158.75	0.6	1	0.5	0.2	0.2	0.2	0.6	0	0	7.9	1.32	5.18	4.9	23.08	7.01	43.03	3.31	29.43	33.9	1.24	0.1
1099	0	1.47	1	3	28	1	0	1	77	33	1	1.74	0	1	21.5	3.5	5.4	5	1.1	0.5	2	0.2	0.1	0	46	3	0.5	2732.14	1.3	2	1.8	0.4	0.2	0.7	0.1	0	0	16.8	0.69	3.21	2.35	17.81	5.88	30.8	1.48	29.46	31.77	1.03	0.06
1100	0	2.1	1	1	29	0	0	1	69	39.5	1	3.37	0	1	22.1	2.1	3.7	2.6	0.6	0.5	0	5	0	0	72	1	0.9	2488.63	0.8	1.5	1	0.2	0.2	0	2	0	0	28.9	1.29	6.99	5.73	18.8	5.65	39.8	3.3	28.27	32.68	2.02	0.07
1101	0	0	0	2	43	0	1	1	43	30.2	1	1.6	1	0	22.3	1.9	2	1.2	1.8	0.5	0	2.5	0	0	51	1.5	0	2354.69	0.8	0.8	0.5	0.8	0.2	0	1.1	0	0	21.7	1.05	3.69	2.63	20.55	5.9	34.74	2.34	31.32	34.6	4.02	0.08
1102	0	0	0	2	28	1	0	0	34	41.2	0	3.55	1	1	23.1	1.7	0.8	1.2	0.9	0.5	0	0	0	0	16	2.5	0.3	1348.04	1.3	0.6	0.9	0.7	0.4	0	0	0	0	11.9	1.16	7.37	5.58	19.05	6.9	41.72	1.96	32.86	36.58	1.39	0.07
1103	0	0	0	2.5	42	1	1	1	44	38	0	3.3	0	0	22.6	1.5	2.9	2	0.2	0	1.2	0	0	0	43	1	0.2	1508.27	1	1.9	1.3	0.1	0	0.8	0	0	0	28.5	0.98	3.05	2.09	17.99	6.13	31.06	1.86	32.72	35.73	3.78	0.07
1104	0	0	0	2	31	0	0	1	102	40.5	1	3.35	1	1	18.4	3.4	2.6	3.65	1	0.5	0	2.5	0	0	54	4	0.6	2222.01	1.5	1.2	1.6	0.5	0.2	0	1.1	0	0	24.3	0.59	2.72	3.09	24.34	5.61	37.41	3.99	34.9	40.65	1.65	0.04
1105	0	0	0	3	25	0	0	0	47	40.3	1	3.6	1	1	22.3	2	3.4	1.6	1.6	0	0	0	0	0.1	25	2	0	1716.45	1.2	2	0.9	0.9	0	0	0	0	0.1	14.6	0.7	2.44	2.2	22.4	7.18	35.67	3.34	34.5	39.02	1.31	0.02
1106	0	0	0	2	25	1	0	0	39	40.4	0	3.1	0	1	25	1	0.8	2	0.5	1	0.7	2.5	0	0	15	1.2	0.9	1015.65	1	0.8	2	0.5	1	0.7	2.5	0	0	14.8	1.23	4.54	3.81	21.88	5.43	38.23	4.17	29.14	34.56	1.91	0.08
1107	1	0	0	1.5	30	0	0	0	67	39.4	0	3.3	1	1	20.3	4	1.8	0.5	1.3	0.5	0	2	0	0	18	2	0	3244.22	1.2	0.6	0.2	0.4	0.2	0	0.6	0	0	5.5	0.7	2.53	3.15	23.41	5.97	36.83	3.24	33.91	39.07	1.71	0.06
1108	0	0	0	2	25	1	0	0	33	37.5	0	2.75	1	1	21.7	3	6.5	1.9	0.3	1	0	2.5	0	0	42	2.4	0.2	2186.18	1.4	3	0.9	0.1	0.5	0	1.1	0	0	19.2	1.79	7.42	6.18	20.43	5.5	42.47	2.63	26.2	29.74	2.6	0.04
1109	0	0	0	1.5	30	0	0	0	50	39.2	1	3.15	1	1	18	3.6	0	0	1.5	0.5	0	0	0	0	13	2.8	0.5	1738.57	2.1	0	0	0.9	0.3	0	0	0	0	7.5	0.87	4.74	3.15	18.82	4.36	32.74	2.76	33.54	37.6	3.62	0.04
1110	0	0	0	1.5	31	0	0	0	50	39.5	1	3.15	1	1	23.6	2	2.94	0	0.4	1	0.3	0	0	0	46	2.5	0.5	2146.94	0.9	1.4	0	0.2	0.5	0.1	0	0	0	21.4	0.53	2.53	2.35	19.5	5.83	31.58	4.71	31.91	39.93	2.6	0.07
1111	0	1.05	1	0.5	35	0	0	1	36	39	0	3.05	1	1	20.3	2	3	3	2.3	0.5	0.75	2.5	0.05	0	44	2	0	2536.46	0.8	1.2	1.2	0.9	0.2	0.3	1	0	0	17.3	0.56	3.69	3.14	21.51	6.64	36.52	3.24	29.87	34.28	2.52	0.09
1112	0	2.4	1	1	32	1	0	1	48	40.1	0	3.1	1	1	18.8	4.6	2.4	1	0.7	2.3	0	0	0	0	20	1.6	0	2988.9	1.5	0.8	0.3	0.2	0.8	0	0	0	0	6.7	2.01	6.74	5.94	20.76	7.2	44.33	2.81	24.41	28.57	1.31	0.09
1113	0	0	0	2	32	0	1	1	47	40.6	1	2.75	1	1	24.4	2	5.55	1.07	1	0	0.3	1	0	0.07	34	2	1	2308.95	0.9	2.4	0.5	0.4	0	0.1	0.4	0	0	14.7	0.79	2.99	2.09	18.64	4.88	30.43	1.95	31.77	34.48	3.04	0.06
1114	0	0	0	3.5	32	0	0	1	52	39	0	3	1	1	20.3	3.7	2.3	3.4	0.5	1	0	2.5	0	0.07	43	2	0	2239.09	1.7	1	1.5	0.2	0.4	0	1.1	0	0	19.2	1.83	6.76	5.42	20.08	4.96	39.91	2.85	26.6	30.37	2.73	0.05
1115	0	0	0	1	33	0	0	1	79	39	1	3.3	1	1	19.2	3	3.1	3	0.4	0.65	0	0	0.2	0	50	4	0.4	3087.3	1	1	1	0.1	0.2	0	0	0.1	0	16.2	0.88	2.82	1.8	17.72	5.72	30.61	1.22	32.43	34.52	1.95	0.04
[truncated: 13 more columns]
